# Supplementary material for: The role of graphene formed on silver nanowire transparent conductive electrode in ultra-violet light emitting diodes
Source: PubMed Central journal article supplement (PMC4937441; doi:10.1038/srep29464), 2016-07-08
Supplement: srep29464-s1.pdf [file srep29464-s1.pdf]

# **The role of graphene formed on silver nanowire transparent conductive electrode in ultra-violet light emitting diodes**

*Tae Hoon Seo,<sup>1</sup> Seula Lee,<sup>1</sup> Kyung Hyun Min,<sup>1,3</sup> S. Chandramohan,<sup>3</sup> Ah Hyun Park,<sup>3</sup> Gun Hee Lee,<sup>3</sup> Min Park,<sup>2</sup> Eun-Kyung Suh<sup>3,\*</sup> and Myung Jong Kim<sup>1,\*</sup>*

<sup>1</sup> Applied Quantum Composites Research Center, <sup>2</sup> Photoelectronic Hybrid Research Center, Korea Institute of Science and Technology, Jeonbuk 565-905<sup>†</sup> and Seoul 136-791<sup>‡</sup>, South Korea

<sup>3</sup> School of Semiconductor and Chemical Engineering, Semiconductor Physics Research Center, Chonbuk National University, Jeonju 561-756, South Korea

---

\* **Corresponding author.** Tel.: +82-63-219-8135, +82-63-270-3441

E-mail: myung@kist.re.kr (M. J. Kim)

E-mail: eksuh@jbnu.ac.kr (E.-K. Suh)

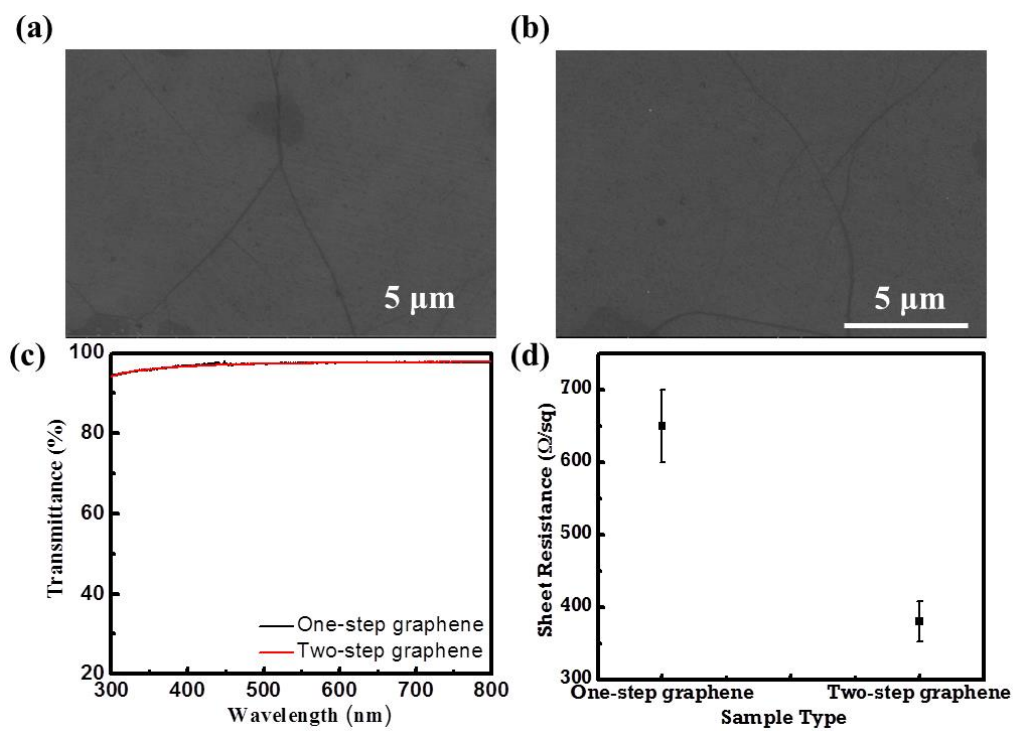

**Figure S1.** SEM images of fully-covered (a) one-step and (b) two-step graphene, respectively. (c) and (d) their opto-electrical properties.

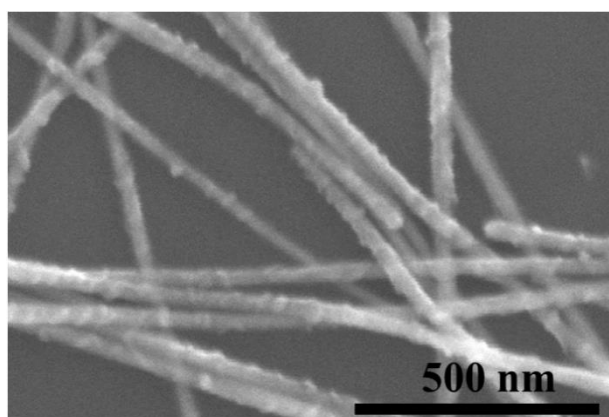

**Figure S2.** The SEM image of AgNWs formed on sapphire.

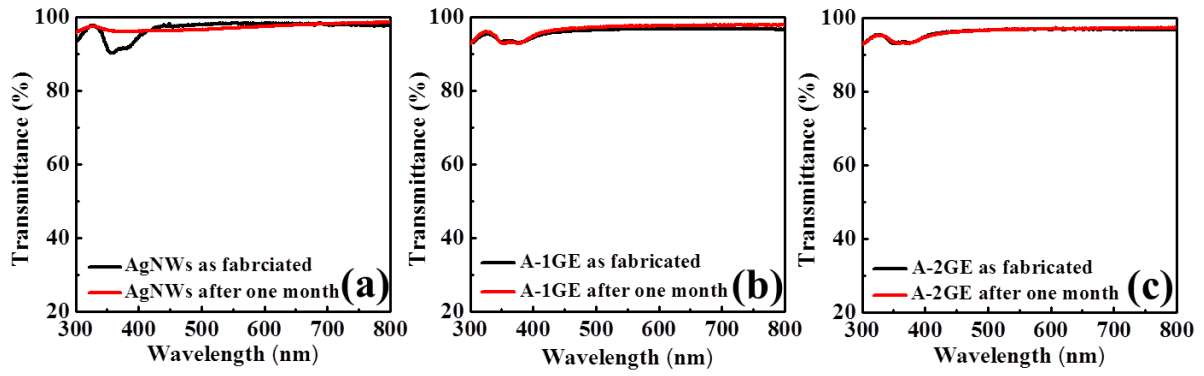

**Figure S3.** Transmittance characteristics of (a) AgNWs, (b) A-1GE, and (c) A-2GE as a function of wavelength on polished sapphire substrate at initial and after one month.

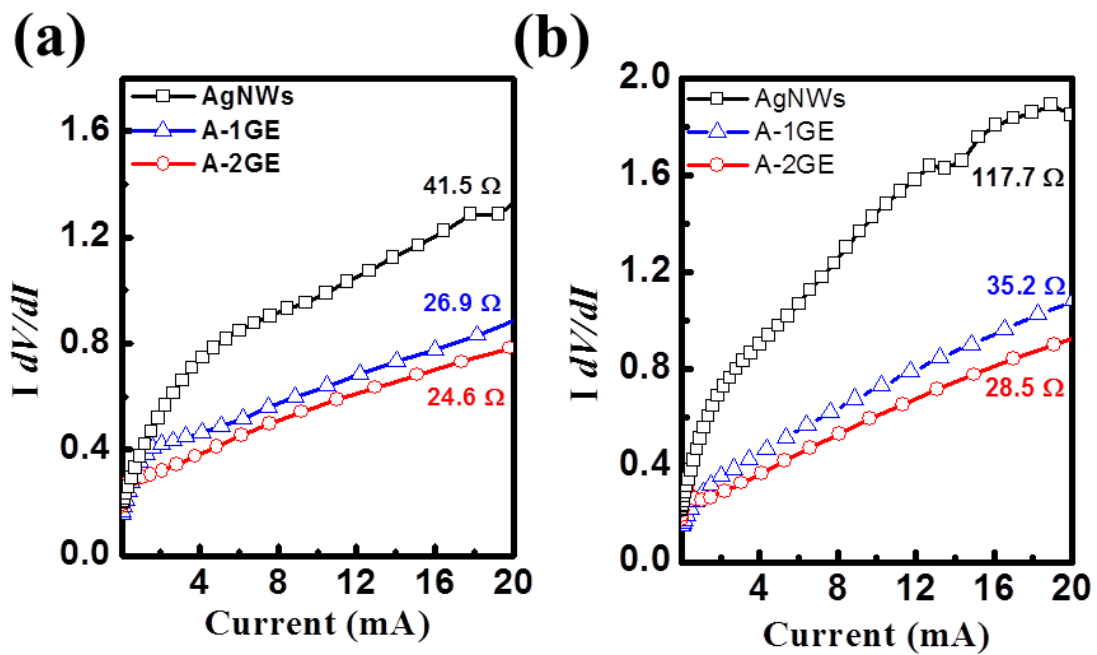

**Figure S4.**  $I(dV/dI)$  versus  $I$  plots for LED with various electrodes at (a) initial and (b) after one month

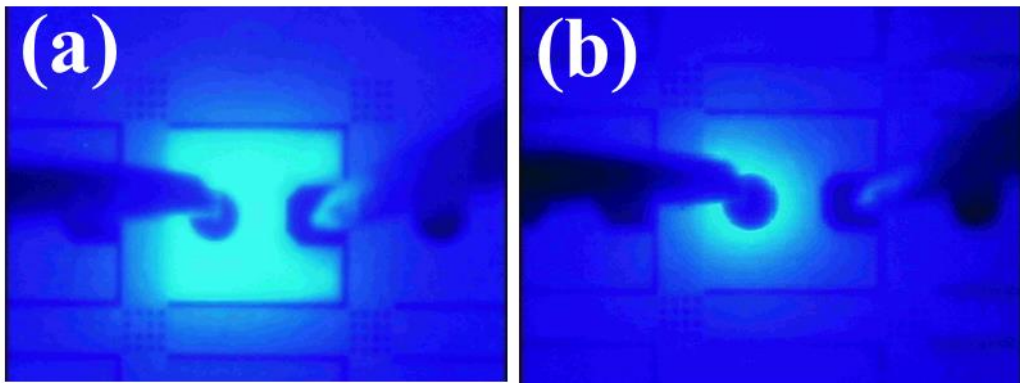

**Figure S5.** EL images of blue-LEDs using bare AgNWs during light emission at an injection current 5 mA at (a) first and (b) after one month.

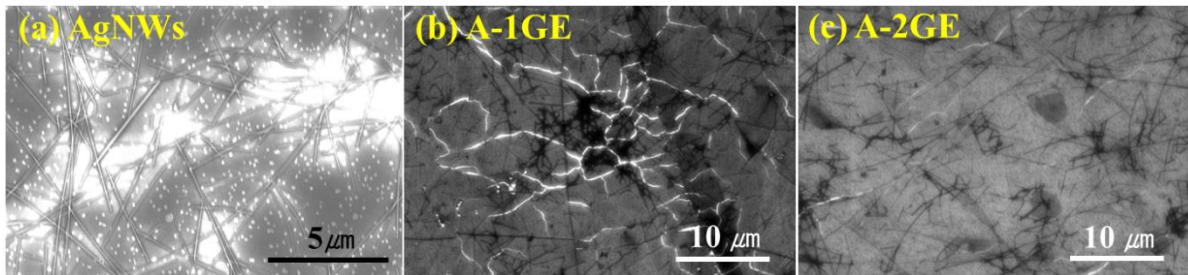

**Figure S6.** SEM images of (a) AgNWs, (b) A-1GE, and (c) A-2GE after exposed 380 nm UV emission during 300 s, respectively.
